# Supplementary material for: Do case‐only designs yield consistent results across design and different databases? A case study of hip fractures and benzodiazepines
Source: PubMed Central journal article supplement (PMC4949640; doi:10.1002/pds.3822), 2015-06-26
Supplement: PDS-25-79-s001.pdf [file PDS-25-79-s001.pdf]

Table S1 online- ICPC-2 and READ Codes for hip/femur fracture (BIFAP and CPRD databases)

| <b>CODES</b>  | <b>HIP/FEMUR FRACTURES</b>                                    |
|---------------|---------------------------------------------------------------|
| <b>ICPC-2</b> |                                                               |
| L75           | Fracture: femur                                               |
|               |                                                               |
| <b>READ</b>   | <b>HIP FRACTURES</b>                                          |
| 7K1L400       | CLOSED REDUCTION OF FRACTURE OF HIP                           |
| S30..00       | FRACTURE OF NECK OF FEMUR                                     |
| S30..11       | HIP FRACTURE                                                  |
| S300.00       | CLOSED FRACTURE PROXIMAL FEMUR, TRANSCERVICAL                 |
| S300000       | Cls # prox femur, intracapsular section, unspecified          |
| S300100       | CLOSED FRACTURE PROXIMAL FEMUR, TRANSEPIPHYSEAL               |
| S300200       | CLOSED FRACTURE PROXIMAL FEMUR, MIDCERVICAL SECTION           |
| S300300       | CLOSED FRACTURE PROXIMAL FEMUR, BASICERVICAL                  |
| S300311       | CLOSED FRACTURE, BASE OF NECK OF FEMUR                        |
| S300400       | CLOSED FRACTURE HEAD OF FEMUR                                 |
| S300500       | Cls # prox femur, subcapital, Garden grade unspec.            |
| S300600       | CLOSED FRACTURE PROXIMAL FEMUR, SUBCAPITAL, GARDEN GRADE I    |
| S300700       | CLOSED FRACTURE PROXIMAL FEMUR, SUBCAPITAL, GARDEN GRADE II   |
| S300800       | CLOSED FRACTURE PROXIMAL FEMUR, SUBCAPITAL, GARDEN GRADE III  |
| S300900       | CLOSED FRACTURE PROXIMAL FEMUR, SUBCAPITAL, GARDEN GRADE IV   |
| S300A00       | CLOSED FRACTURE OF FEMUR, UPPER EPIPHYSIS                     |
| S300y00       | CLOSED FRACTURE PROXIMAL FEMUR, OTHER TRANSCERVICAL           |
| S300y11       | CLOSED FRACTURE OF FEMUR, SUBCAPITAL                          |
| S300z00       | CLOSED FRACTURE PROXIMAL FEMUR, TRANSCERVICAL, NOS            |
| S301.00       | OPEN FRACTURE PROXIMAL FEMUR, TRANSCERVICAL                   |
| S301000       | Opn # proximal femur, intracapsular section, unspecified      |
| S301100       | OPEN FRACTURE PROXIMAL FEMUR, TRANSEPIPHYSEAL                 |
| S301200       | OPEN FRACTURE PROXIMAL FEMUR, MIDCERVICAL SECTION             |
| S301300       | OPEN FRACTURE PROXIMAL FEMUR, BASICERVICAL                    |
| S301311       | OPEN FRACTURE BASE OF NECK OF FEMUR                           |
| S301400       | OPEN FRACTURE HEAD, FEMUR                                     |
| S301500       | OPEN FRACTURE PROXIMAL FEMUR, SUBCAPITAL, GARDEN GRADE UNSPEC |
| S301600       | OPEN FRACTURE PROXIMAL FEMUR, SUBCAPITAL, GARDEN GRADE I      |
| S301700       | OPEN FRACTURE PROXIMAL FEMUR, SUBCAPITAL, GARDEN GRADE II     |
| S301800       | OPEN FRACTURE PROXIMAL FEMUR, SUBCAPITAL, GARDEN GRADE III    |
| S301900       | OPEN FRACTURE PROXIMAL FEMUR, SUBCAPITAL, GARDEN GRADE IV     |
| S301A00       | OPEN FRACTURE OF FEMUR, UPPER EPIPHYSIS                       |
| S301y00       | OPEN FRACTURE PROXIMAL FEMUR, OTHER TRANSCERVICAL             |
| S301y11       | OPEN FRACTURE OF FEMUR, SUBCAPITAL                            |
| S301z00       | OPEN FRACTURE PROXIMAL FEMUR, TRANSCERVICAL, NOS              |
| S302.00       | CLOSED FRACTURE OF PROXIMAL FEMUR, PERTROCHANTERIC            |
| S302000       | Cls # proximal femur, trochanteric section, unspecified       |
| S302011       | CLOSED FRACTURE OF FEMUR, GREATER TROCHANTER                  |
| S302012       | CLOSED FRACTURE OF FEMUR, LESSER TROCHANTER                   |
| S302100       | CLOSED FRACTURE PROXIMAL FEMUR, INTERTROCHANTERIC, TWO PART   |
| S302200       | CLOSED FRACTURE PROXIMAL FEMUR, SUBTROCHANTERIC               |
| S302300       | Cls # proximal femur, intertrochanteric, comminuted           |
| S302400       | CLOSED FRACTURE OF FEMUR, INTERTROCHANTERIC                   |

|             |                                                              |
|-------------|--------------------------------------------------------------|
| S302z00     | Cls # of proximal femur, pertrochanteric section, NOS        |
| S303.00     | OPEN FRACTURE OF PROXIMAL FEMUR, PERTROCHANTERIC             |
| S303011     | OPEN FRACTURE OF FEMUR, GREATER TROCHANTER                   |
| S303012     | OPEN FRACTURE OF FEMUR, LESSER TROCHANTER                    |
| S303100     | OPEN FRACTURE PROXIMAL FEMUR, INTERTROCHANTERIC, TWO PART    |
| S303200     | OPEN FRACTURE PROXIMAL FEMUR, SUBTROCHANTERIC                |
| S303300     | OPEN FRACTURE PROXIMAL FEMUR, INTERTROCHANTERIC, COMMINUTED  |
| S303400     | OPEN FRACTURE OF FEMUR, INTERTROCHANTERIC                    |
| S303z00     | OPEN FRACTURE OF PROXIMAL FEMUR, PERTROCHANTERIC, NOS        |
| S304.00     | PERTROCHANTERIC FRACTURE                                     |
| S305.00     | SUBTROCHANTERIC FRACTURE                                     |
| S30w.00     | CLOSED FRACTURE OF UNSPECIFIED PROXIMAL FEMUR                |
| S30x.00     | OPEN FRACTURE OF UNSPECIFIED PROXIMAL FEMUR                  |
| S30y.00     | CLOSED FRACTURE OF NECK OF FEMUR NOS                         |
| S30y.11     | HIP FRACTURE NOS                                             |
| S30z.00     | OPEN FRACTURE OF NECK OF FEMUR NOS                           |
| S4E..00     | FRACTURE-DISLOCATION OR SUBLUXATION HIP                      |
| S4E0.00     | CLOSED FRACTURE-DISLOCATION, HIP JOINT                       |
| S4E1.00     | OPEN FRACTURE-DISLOCATION, HIP JOINT                         |
| S4E2.00     | CLOSED FRACTURE-SUBLUXATION, HIP JOINT                       |
| S4E3.00     | OPEN FRACTURE-SUBLUXATION, HIP JOINT                         |
| <b>READ</b> | <b>FEMUR FRACTURES</b>                                       |
| 7K1G200     | Primary open reduction+external fixation of femoral fracture |
| 7K1L500     | CLOSED REDUCTION OF FRACTURE OF FEMUR                        |
| K7805F      | REDUCTION CLOSED FRACTURE FEMUR                              |
| K7815F      | REDUCTION OPEN FRACTURE FEMUR                                |
| S31..00     | OTHER FRACTURE OF FEMUR                                      |
| S310.00     | CLOSED FRACTURE OF FEMUR, SHAFT OR UNSPECIFIED PART          |
| S310000     | CLOSED FRACTURE OF FEMUR, UNSPECIFIED PART                   |
| S310100     | CLOSED FRACTURE SHAFT OF FEMUR                               |
| S310011     | Thigh fracture NOS                                           |
| S310012     | Upper leg fracture NOS                                       |
| S310100     | Closed fracture shaft of femur                               |
| S310z00     | Closed fracture of shaft or unspecified part, NOS            |
| S311.00     | OPEN FRACTURE OF FEMUR, SHAFT OR UNSPECIFIED PART            |
| S311000     | OPEN FRACTURE OF FEMUR, UNSPECIFIED PART                     |
| S311100     | OPEN FRACTURE SHAFT OF FEMUR                                 |
| S311z00     | OPEN FRACTURE OF FEMUR, SHAFT OR UNSPECIFIED PART, NOS       |
| S312.00     | CLOSED FRACTURE DISTAL FEMUR                                 |
| S312.11     | CLOSED FRACTURE OF FEMUR, DISTAL END                         |
| S312000     | CLOSED FRACTURE OF DISTAL FEMUR, UNSPECIFIED                 |
| S312100     | Closed fracture of femoral condyle, unspecified              |
| S312200     | CLOSED FRACTURE OF FEMUR, LOWER EPIPHYSIS                    |
| S312300     | CLOSED FRACTURE DISTAL FEMUR, SUPRACONDYLAR                  |
| S312400     | CLOSED FRACTURE DISTAL FEMUR, MEDIAL CONDYLE                 |
| S312500     | CLOSED FRACTURE DISTAL FEMUR, LATERAL CONDYLE                |
| S312600     | CLOSED FRACTURE DISTAL FEMUR, BICONDYLAR (T-Y FRACTURE)      |
| S312x00     | CLOSED FRACTURE DISTAL FEMUR, COMMINUTED/INTRA-ARTICULAR     |
| S312z00     | CLOSED FRACTURE OF DISTAL FEMUR NOT OTHERWISE SPECIFIED      |
| S313.00     | OPEN FRACTURE DISTAL FEMUR                                   |
| S313.11     | OPEN FRACTURE OF FEMUR, DISTAL END                           |
| S313000     | OPEN FRACTURE DISTAL FEMUR, UNSPECIFIED                      |

|         |                                                        |
|---------|--------------------------------------------------------|
| S313100 | OPEN FRACTURE OF FEMORAL CONDYLE, UNSPECIFIED          |
| S313200 | OPEN FRACTURE OF FEMUR, LOWER EPIPHYSIS                |
| S313300 | OPEN FRACTURE DISTAL FEMUR, SUPRACONDYLAR              |
| S313400 | OPEN FRACTURE DISTAL FEMUR, MEDIAL CONDYLE             |
| S313500 | OPEN FRACTURE DISTAL FEMUR, LATERAL CONDYLE            |
| S313600 | OPEN FRACTURE DISTAL FEMUR, BICONDYLAR (T-Y FRACTURE)  |
| S313x00 | OPEN FRACTURE DISTAL FEMUR, COMMINUTED/INTRA-ARTICULAR |
| S313z00 | OPEN FRACTURE OF DISTAL FEMUR NOT OTHERWISE SPECIFIED  |
| S314.00 | FRACTURE OF SHAFT OF FEMUR                             |
| S315.00 | FRACTURE OF LOWER END OF FEMUR                         |
| S31z.00 | FRACTURE OF FEMUR, NOS                                 |
| S3x2.00 | MULTIPLE FRACTURES OF FEMUR                            |
| SC3D400 | SEQUELAE OF FRACTURE OF FEMUR                          |
| Syu7200 | [X]FRACTURES OF OTHER PARTS OF FEMUR                   |

Table S2 online- List of benzodiazepines, DDD, and Half-life.

| ATC code | Name                  | Defined Daily Dose DDD | Unit | Half-life*          |
|----------|-----------------------|------------------------|------|---------------------|
| N05B     |                       |                        |      |                     |
| N05BA01  | diazepam              | 10                     | mg   | Long (>24)          |
| N05BA02  | chlordiazepoxide      | 30                     | mg   | Long (>24)          |
| N05BA03  | medazepam             | 20                     | mg   | Long (>24)          |
| N05BA04  | oxazepam              | 50                     | mg   | Intermediate (8-24) |
| N05BA05  | potassium clorazepate | 20                     | mg   | Long (>24)          |
| N05BA06  | lorazepam             | 2.5                    | mg   | Intermediate (8-24) |
| N05BA07  | adinazolam            |                        |      | Short (<8)          |
| N05BA08  | bromazepam            | 10                     | mg   | Intermediate (8-24) |
| N05BA09  | clobazam              | 20                     | mg   | Intermediate (8-24) |
| N05BA10  | ketazolam             |                        | mg   | Intermediate (8-24) |
| N05BA11  | prazepam              | 30                     | mg   | Long (>24)          |
| N05BA12  | alprazolam            | 1                      | mg   | Intermediate (8-24) |
| N05BA13  | halazepam             | 0.1                    | g    | Long (>24)          |
| N05BA14  | pinazepam             |                        | mg   | Intermediate (8-24) |
| N05BA15  | camazepam             | 30                     | mg   | Intermediate (8-24) |
| N05BA16  | nordazepam            | 15                     | mg   | Long (24)           |
| N05BA17  | fludiazepam           | 0.75                   | mg   | Long (>24)          |
| N05BA19  | etizolam              |                        | mg   | Short (<8)          |
| N05BA21  | clotiazepam           |                        | mg   | Short (<8)          |
| N05CD    |                       |                        |      |                     |
| N05CD01  | flurazepam            | 30                     | mg   | Long (>24)          |
| N05CD02  | nitrazepam            | 5                      | mg   | Long(>24)           |
| N05CD03  | flunitrazepam         | 1                      | mg   | Intermediate (8-24) |
| N05CD04  | estazolam             | 3                      | mg   | Intermediate (8-24) |
| N05CD05  | triazolam             | 0.25                   | mg   | Short(<8)           |
| N05CD06  | lormetazepam          | 1                      | mg   | Intermediate(8-24)  |
| N05CD07  | temazepam             | 20                     | mg   | Intermediate(8-24)  |
| N05CD08  | midazolam             | 15                     | mg   | Short(<8)           |
| N05CD09  | brotizolam            | 0.25                   | mg   | Short (<8)          |
| N05CD10  | quazepam              | 15                     | mg   | Long(>24)           |
| N05CD11  | loprazolam            | 1                      | mg   | Intermediate(8-24)  |
| N05CF    |                       |                        |      |                     |
| N05CF01  | zopiclone*            | 7.5                    | mg   | Short (<8)          |
| N05CF02  | zolpidem*             | 10                     | mg   | Short (<8)          |
| N05CF03  | zaleplon              | 10                     | mg   | Short (<8)          |
| N05CM    |                       |                        |      |                     |
| N05CM02  | Clomethiazole         | 1.5                    | g    |                     |

\* **Half life** definitions: Short (<8); Intermediate (8-24), Long (>24)

Table S3 online – List of medication codes included as potential confounders

|          |                                                  |
|----------|--------------------------------------------------|
| ATC code |                                                  |
| H02AB    | Glucocorticoids                                  |
| M05BA01  | etidronic acid                                   |
| M05BA02  | clodronic acid                                   |
| M05BA03  | pamidronic acid                                  |
| M05BA04  | alendronic acid                                  |
| M05BA05  | tiludronic acid                                  |
| M05BA06  | ibandronic acid                                  |
| G03XC01  | raloxifene                                       |
| H05AA    | Parathyroid hormones and analogues               |
| M05BX03  | Strontium ranelate                               |
| A11CC04  | calcitriol                                       |
| A11CC05  | colecalfiferol                                   |
|          | calcium+ colecalfiferol                          |
| A11CC06  | calcifediol                                      |
| H05BA    | Calcitonin preparations                          |
| N06AA    | Non-selective monoamine reuptake inhibitors      |
| N06AB    | Selective serotonin reuptake inhibitors          |
| N05A     | Antipsychotics                                   |
| N05AA    | Phenothiazine with aliphatic side-chain          |
| N05AB    | Phenothiazines with piperazine structure         |
| N05AC    | Phenothiazines with piperidine structure         |
| N05AD    | Butyrophenone derivatives                        |
| N05AE    | Indole derivatives                               |
| N05AF    | Thioxanthene derivative                          |
| N05AG    | Diphenylbutylpiperidine derivatives              |
| N05AH    | Diazepines, oxazepines, thiazepines and oxepines |
| N05AL    | Benzamides                                       |
| N05AN    | Lithium                                          |
| N05AX    | Other antipsychotics                             |
| N04      | Anti-Parkinson drugs                             |
| N04A     | Anticholinergic agents                           |
| N04AA    | Tertiary amines                                  |
| N04AB    | Ethers chemically close to antihistamine         |
| N04AC    | Ethers of tropine or tropine derivatives         |
| N04B     | Dopaminergic agents                              |
| N04BA    | Dopa and dopa derivatives                        |
| N04BB    | Adamantane derivatives                           |
| N04BC    | Dopamine agonists                                |
| N04BD    | Monoamine oxidase B inhibitors                   |
| N04BX    | Other dopaminergic agents                        |
| N03A     | Antiepileptics                                   |
| N03AA    | Barbiturates and derivatives                     |
| N03AB    | Hydantoin derivatives                            |
| N03AC    | Oxazolidine derivatives                          |
| N03AD    | Succinimide derivatives                          |
| N03AE    | Benzodiazepine derivatives                       |
| N03AF    | Carboxamide derivatives                          |

|         |                                                             |
|---------|-------------------------------------------------------------|
| N03AG   | Fatty acid derivatives                                      |
| N03AX   | Other antiepileptics                                        |
| R03BA   | Glucocorticoids                                             |
| R03BA01 | Beclometasone                                               |
| R03BA02 | Budesonide                                                  |
| R03BA03 | Flunisolide                                                 |
| R03BA04 | Betamethasone                                               |
| R03BA05 | Fluticasone                                                 |
| R03BA06 | Triamcinolone                                               |
| R03BA07 | Mometasone                                                  |
| R03BA08 | Ciclesonide                                                 |
| N05BB   | Diphenylmethane derivatives (sedating)                      |
| R03A    | Adrenergics, inhalants                                      |
| R03AC   | Selective beta-2-adrenoreceptor agonists                    |
| R03AK   | Adrenergics and other drugs for obstructive airway diseases |
| R03C    | Adrenergics for systemic use                                |
| R03CC   | Selective beta-2-adrenoreceptor agonists                    |
| R03B    | Other drugs for obstructive airway diseases, inhalants      |
| R03BB   | Anticholinergics                                            |
| C01B    | Antiarrhythmics, class I and III                            |
| C01BA   | Antiarrhythmics, class Ia                                   |
| C01BB   | Antiarrhythmics, class Ib                                   |
| C01BC   | Antiarrhythmics, class Ic                                   |
| C01BD   | Antiarrhythmics, class III                                  |
| C09     | Agents acting on the renin-angiotensin system               |
| C09A    | ACE inhibitors, plain                                       |
| C09AA   | ACE inhibitors, plain                                       |
| C09B    | ACE inhibitors, combinations                                |
| C09BA   | ACE inhibitors and diuretics                                |
| C09BB   | ACE inhibitors and calcium channel blockers                 |
| C09     | Agents acting on the renin-angiotensin system               |
| C09C    | Angiotensin II antagonists, plain                           |
| C09CA   | Angiotensin II antagonists, plain                           |
| C09D    | Angiotensin II antagonists, combinations                    |
| C09DA   | Angiotensin II antagonists and diuretics                    |
| C09DB   | Angiotensin II antagonists and calcium channel blockers     |
| C09DX   | Angiotensin II antagonists, other combinations              |
| C07A    | Beta blocking agents                                        |
| C07AA   | Beta blocking agents, non-selective                         |
| C07AB   | Beta blocking agents, selective                             |
| C07AG   | Alpha and beta blocking agents                              |
| C07B    | Beta blocking agents and thiazides                          |
| C07BA   | Beta blocking agents, non-selective, and thiazides          |
| C07BB   | Beta blocking agents, selective, and thiazides              |
| C07BG   | Alpha and beta blocking agents and thiazides                |
| C07C    | Beta blocking agents and other diuretics                    |
| C07CA   | Beta blocking agents, non-selective, and other diuretics    |
| C07CB   | Beta blocking agents, selective, and other diuretics        |
| C07CG   | Alpha and beta blocking agents and other diuretics          |
| C07D    | Beta blocking agents, thiazides and other diuretics         |

|       |                                                                       |
|-------|-----------------------------------------------------------------------|
| C07DA | Beta blocking agents, non-selective, thiazides and other diuretics    |
| C07DB | Beta blocking agents, selective, thiazides and other diuretics        |
| C07F  | Beta blocking agents and other antihypertensives                      |
| C07FA | Beta blocking agents, non-selective, and other antihypertensives      |
| C07FB | Beta blocking agents, selective, and other antihypertensives          |
| C08   | Agents acting on the renin-angiotensin system                         |
| C08C  | Selective calcium channel blockers with mainly vascular effects       |
| C08CA | Dihydropyridine derivatives                                           |
| C08CX | Other selective calcium channel blockers with mainly vascular effects |
| C08D  | Selective calcium channel blockers with direct cardiac effects        |
| C08DA | Phenylalkylamine derivatives                                          |
| C08DB | Benzothiazepine derivatives                                           |
| C08E  | Non-selective calcium channel blockers                                |
| C08EA | Phenylalkylamine derivatives                                          |
| C08EX | Other non-selective calcium channel blockers                          |
| C08G  | Calcium channel blockers and diuretics                                |
| C08GA | Calcium channel blockers and diuretics                                |
| C02A  | Antiadrenergic agents, centrally acting                               |
| C02AA | Rauwolfia alkaloids                                                   |
| C02AB | Methyldopa                                                            |
| C02AC | Imidazoline receptor agonists                                         |
| C02C  | Antiadrenergic agents, peripherally acting                            |
| C02CA | Alpha-adrenoreceptor antagonists                                      |
| C02CC | Guanidine derivatives                                                 |
| C02D  | Arteriolar smooth muscle, agents acting on                            |
| C02DA | Thiazide derivatives                                                  |
| C02DB | Hydrazinophthalazine derivatives                                      |
| C02DC | Pyrimidine derivatives                                                |
| C02DD | Nitroferricyanide derivatives                                         |
| C02DG | Guanidine derivatives                                                 |
| C02K  | Other non-selective calcium channel blockers                          |
| C02KA | Alkaloids, excluding rauwolfia                                        |
| C02KB | Tyrosine hydroxylase inhibitors                                       |
| C02KC | MAO inhibitors                                                        |
| C02KD | Serotonin antagonists                                                 |
| C02KX | Other antihypertensives                                               |
| C02L  | Calcium channel blockers and diuretics                                |
| C02LA | Rauwolfia alkaloids and diuretics in combination                      |
| C02LB | Methyldopa and diuretics in combination                               |
| C02LC | Imidazoline receptor agonists in combination with diuretics           |
| C02LE | Alpha-adrenoreceptor antagonists and diuretics                        |
| C02LF | Guanidine derivatives and diuretics                                   |
| C02LG | Hydrazinophthalazine derivatives and diuretics                        |
| C02LK | Alkaloids, excluding rauwolfia, in combination with diuretics         |
| C02LL | MAO inhibitors and diuretics                                          |
| C02LN | Serotonin antagonists and diuretics                                   |
| C02LX | Other antihypertensives and diuretics                                 |
| C03A  | Low-ceiling diuretics, thiazides                                      |
| C03AA | Thiazides, plain                                                      |
| C03AB | Thiazides and potassium in combination                                |

|                 |                                                              |
|-----------------|--------------------------------------------------------------|
| C03AH           | Thiazides, combinations with psycholeptics and/or analgesics |
| C03AX           | Thiazides, combinations with other drugs                     |
| C03B            | Low-ceiling diuretics, excluding thiazides                   |
| C03BA           | Sulfonamides, plain                                          |
| C03BB           | Sulfonamides and potassium in combination                    |
| C03BC           | Mercurial diuretics                                          |
| C03BD           | Xanthine derivatives                                         |
| C03BK           | Sulfonamides, combinations with other drugs                  |
| C03BX           | Other low-ceiling diuretics                                  |
| C03C            | High-ceiling diuretics                                       |
| C03CA           | Sulfonamides, plain                                          |
| C03CB           | Sulfonamides and potassium in combination                    |
| C03CC           | Aryloxyacetic acid derivatives                               |
| C03CD           | Pyrazolone derivatives                                       |
| C03CX           | Other high-ceiling diuretics                                 |
| C03D            | Potassium-sparing agents                                     |
| C03DA           | Aldosterone antagonists                                      |
| C03DB           | Other potassium-sparing agents                               |
| C03E            | Diuretics and potassium-sparing agents in combination        |
| C03EA           | Low-ceiling diuretics and potassium-sparing agents           |
| C03EB           | High-ceiling diuretics and potassium-sparing agents          |
| C03X            | Other diuretics                                              |
| C03XA           | Vasopressin antagonists                                      |
| G03C            | Estrogens                                                    |
| G03CA           | Natural and semi synthetic estrogens, plain                  |
| G03CX           | Other estrogens                                              |
| G03D            | Progestogens                                                 |
| G03DA           | Pregnen-(4) derivatives                                      |
| G03DC           | Estren derivatives                                           |
| G03F            | Progestogens and estrogens in combination                    |
| G03FA           | Progestogens and estrogens, fixed combinations               |
| G03FB           | Progestogens and estrogens, sequential preparations          |
| H03A            | Thyroid preparations                                         |
| H03AA           | Thyroid hormones                                             |
| H03B            | Antithyroid preparations                                     |
| H03BA           | Thiouracils                                                  |
| H03BB           | Sulphur-containing imidazole derivatives                     |
| H03BC           | Perchlorates                                                 |
| H03BX           | Other antithyroid preparations                               |
| M01CB03         | Auranofin                                                    |
| M01CB02         | Sodium aurothiomalate                                        |
| M01CC01         | Penicillamine                                                |
| P01BA01         | Chloroquine                                                  |
| P01BA02         | Hydroxychloroquine sulphate                                  |
| L04AX01         | Azathioprine                                                 |
| L04AD01         | Cyclosporine                                                 |
| L04AA13         | Leflunomide                                                  |
| L01BA01/L01AX03 | Methotrexate                                                 |
| L04AA24         | Abatacept                                                    |
| L04AB04         | Adalimumab                                                   |



|         |                                                                               |
|---------|-------------------------------------------------------------------------------|
| L04AC03 | Anakinra                                                                      |
| L04AB01 | Etanercept                                                                    |
| L04AB02 | Infliximab                                                                    |
| L01XC02 | Rituximab                                                                     |
| A07EC01 | Sulfasalazine                                                                 |
| A10BG   | Thiazolidinediones                                                            |
| A10A    | Insulins and analogues                                                        |
| A10AB   | Insulins and analogues for injection, fast-acting                             |
| A10AC   | Insulins and analogues for injection, intermediate-acting                     |
| A10AD   | Insulins and analogues for injection, interm-acting combined with fast-acting |
| A10AE   | Insulins and analogues for injection, long-acting                             |
| A10AF   | Insulins and analogues for inhalation                                         |
| A10B    | Blood glucose lowering drugs, excluding insulins                              |
| A10BA   | Biguanides                                                                    |
| A10BB   | Sulfonamides, urea derivatives                                                |
| A10BC   | Sulfonamides (heterocyclic)                                                   |
| A10BD   | Combinations of oral blood glucose lowering drugs                             |
| A10BF   | Alpha glucosidase inhibitors                                                  |
| A10BH   | Dipeptidyl peptidase 4 (DPP-4) inhibitors                                     |
| A10BX   | Other blood glucose lowering drugs, excluding insulins                        |
| A10X    | Other drugs used in diabetes                                                  |
| A10XA   | Aldose reductase inhibitors                                                   |
| A03F    | Propulsives                                                                   |
| A03FA   | Propulsives                                                                   |
| A03FA01 | Metoclopramide                                                                |
| B01AA   | Vit K antagonist                                                              |
| B01AB   | Heparin group                                                                 |
| N02A    | Opioids                                                                       |
| N02AA   | Natural opium alkaloids                                                       |
| N02AB   | Phenylpiperidine derivatives                                                  |
| N02AC   | Diphenylpropylamine derivatives                                               |
| N02AD   | Benzomorphan derivatives                                                      |
| N02AE   | Oripavine derivatives                                                         |
| N02AF   | Morphinan derivatives                                                         |
| N02AG   | Opioids in combination with antispasmodics                                    |
| N02AX   | Other opioids                                                                 |
| M01AA   | Butylpyrazolidines                                                            |
| M01AB   | Acetic acid derivatives and related substances                                |
| M01AC   | Oxicams                                                                       |
| M01AE   | Propionic acid derivatives                                                    |
| M01AG   | Fenamates                                                                     |
| M01AH   | Coxibs                                                                        |
| M01AX   | Other antiinflammatory and antirheumatic agents, non-steroids                 |
| C10AA01 | simvastatin                                                                   |
| C10AA02 | lovastatin                                                                    |
| C10AA03 | pravastatin                                                                   |
| C10AA04 | fluvastatin                                                                   |
| C10AA05 | atorvastatin                                                                  |
| C10AA06 | cerivastatin                                                                  |

|         |                   |
|---------|-------------------|
| C10AA07 | rosuvastatin      |
| C10AA08 | pitavastatin      |
| A02BC01 | omeprazole        |
| A02BC02 | pantoprazole      |
| A02BC03 | lansoprazole      |
| A02BC04 | rabeprazole       |
| A02BC05 | esomeprazole      |
| L02BG   | Enzyme inhibitors |
| L02BG01 | aminoglutethimide |
| L02BG02 | formestane        |
| L02BG03 | anastrozole       |
| L02BG04 | letrozole         |
| L02BG05 | vorozole          |
| L02BG06 | exemestane        |

Table S4 online- Co-morbidity and co-medication at case and control moments in BIFAP and CPRD. Case-crossover study

|                                                         | BIFAP              |       |          |        | CPRD                |       |          |        |
|---------------------------------------------------------|--------------------|-------|----------|--------|---------------------|-------|----------|--------|
|                                                         | Cases date N=5,412 |       | Crude OR | 95% CI | Cases date N=12,853 |       | Crude OR | 95% CI |
|                                                         | n                  | %     |          |        | n                   | %     |          |        |
| <b>Co-morbidities (anytime before case moment)</b>      |                    |       |          |        |                     |       |          |        |
| Previous fractures ((including hip/femur and any other) | 1010               | 18.66 | NA       | NA     | 2149                | 16.72 | NA       | NA     |
| Rheumatoid arthritis (not including osteoporosis)       | 80                 | 1.48  | NA       | NA     | 239                 | 1.86  | NA       | NA     |
| Osteoporosis                                            | 844                | 15.59 | NA       | NA     | 1101                | 8.57  | NA       | NA     |
| Paget's disease                                         | 24                 | 0.44  | NA       | NA     | 34                  | 0.26  | NA       | NA     |
| Anaemia                                                 | 879                | 16.24 | NA       | NA     | 1058                | 8.23  | NA       | NA     |
| Epilepsy/Seizures                                       | 94                 | 1.74  | NA       | NA     | 301                 | 2.34  | NA       | NA     |
| Syncope                                                 | 665                | 12.29 | NA       | NA     | 530                 | 4.12  | NA       | NA     |
| Ischaemic heart disease                                 | 661                | 12.21 | NA       | NA     | 1142                | 8.89  | NA       | NA     |
| Cerebrovascular disease                                 | 617                | 11.40 | NA       | NA     | 1072                | 8.34  | NA       | NA     |
| Malignant neoplasms                                     | 731                | 13.51 | NA       | NA     | 1369                | 10.65 | NA       | NA     |
| Inflammatory bowel disease                              | 30                 | 0.55  | NA       | NA     | 106                 | 0.82  | NA       | NA     |
| Obstructive airway disease                              | 423                | 7.82  | NA       | NA     | 921                 | 7.17  | NA       | NA     |
| Liver disease                                           | 136                | 2.51  | NA       | NA     | 156                 | 1.21  | NA       | NA     |
| Chronic renal failure                                   | 254                | 4.69  | NA       | NA     | 131                 | 1.02  | NA       | NA     |
| Mental disorders (without depression)                   | 139                | 2.57  | NA       | NA     | 334                 | 2.6   | NA       | NA     |
| Dementia and/or Alzheimers                              | 566                | 10.46 | NA       | NA     | 895                 | 6.96  | NA       | NA     |

| Co-medication             | BIFAP                 |       |                                     |       |             |             | CPRD                   |       |                                    |       |             |        |
|---------------------------|-----------------------|-------|-------------------------------------|-------|-------------|-------------|------------------------|-------|------------------------------------|-------|-------------|--------|
|                           | N                     | %     | N                                   | %     |             |             | N                      | %     | N                                  | %     |             |        |
|                           | Cases date<br>N=5,412 |       | ∑controls*<br>(date1-4)<br>N=20,029 |       | Crude<br>OR | 95% CI      | Cases date<br>N=12,853 |       | ∑control*<br>(date1-4)<br>N=48,382 |       | Crude<br>OR | 95% CI |
| Glucocorticoids >3months  | 97                    | 1.79  | 304                                 | 1.52  | 1.72        | 1.17-2.54   | 173                    | 1.35  | 564                                | 1.17  | 173         | 1.35   |
| Glucocorticoids (inhaled) | 113                   | 2.09  | 467                                 | 2.33  | 0.67        | 0,46-0,96   | 293                    | 2.28  | 1220                               | 2.52  | 293         | 2.28   |
| Bisphosphonate use        | 304                   | 5.62  | 1092                                | 5.45  | 1.26        | 0,97-1,65   | 459                    | 3.57  | 1430                               | 2.96  | 459         | 3.57   |
| Raloxifene                | 22                    | 0.41  | 81                                  | 0.40  | 1.11        | 0,41-3,01   | 10                     | 0.08  | 37                                 | 0.08  | 10          | 0.08   |
| Strontium danelate        | 11                    | 0.20  | 56                                  | 0.28  | 0.48        | 0,15-1,49   | 20                     | 0.16  | 46                                 | 0.10  | 20          | 0.16   |
| Parathyroid hormone       | 9                     | 0.17  | 16                                  | 0.08  | 14.24       | 1,65-122,94 | 0                      | 0.00  | 0                                  | 0.00  | 0           | 0.00   |
| Calcium & Vitamin D       | 451                   | 8.33  | 1638                                | 8.18  | 1.12        | 0,93-1,34   | 765                    | 5.95  | 2301                               | 4.76  | 765         | 5.95   |
| Calcitonin                | 54                    | 1.00  | 172                                 | 0.86  | 1.39        | 0,89-2,16   | 2                      | 0.02  | 8                                  | 0.02  | 2           | 0.02   |
| Antidepressants           | 1332                  | 24.61 | 4511                                | 22.52 | 1.72        | 1,49-1,98   | 1580                   | 12.29 | 5318                               | 10.99 | 1580        | 12.29  |
| Antipsychotics/lithium    | 481                   | 8.89  | 1511                                | 7.54  | 1.54        | 1,30-1,83   | 901                    | 7.01  | 2924                               | 6.04  | 901         | 7.01   |
| Anti-Parkinsons drugs     | 262                   | 4.84  | 911                                 | 4.55  | 1.97        | 1,28-3,02   | 268                    | 2.09  | 930                                | 1.92  | 268         | 2.09   |
| Anticonvulsants           | 463                   | 8.56  | 1562                                | 7.80  | 1.52        | 1,23-1,88   | 474                    | 3.69  | 1584                               | 3.27  | 474         | 3.69   |
| Bronchodilators           | 526                   | 9.72  | 1915                                | 9.56  | 1.11        | 0,92-1,34   | 782                    | 6.08  | 2972                               | 6.14  | 782         | 6.08   |
| Antihypertensives         | 2615                  | 40.00 | 8203                                | 40.96 | 0.95        | 0,84-1,09   | 2334                   | 18.16 | 9055                               | 18.72 | 2334        | 18.16  |
| Diuretics                 | 1385                  | 25.59 | 5110                                | 25.51 | 1.11        | 0,97-1,27   | 1990                   | 15.48 | 7573                               | 15.65 | 1990        | 15.48  |
| Anti-arrhythmics          | 131                   | 2.42  | 421                                 | 2.10  | 1.90        | 1,17-3,09   | 146                    | 1.14  | 533                                | 1.10  | 146         | 1.14   |

|                                                                                |      |       |      |       |      |           |      |       |      |       |      |       |
|--------------------------------------------------------------------------------|------|-------|------|-------|------|-----------|------|-------|------|-------|------|-------|
| <b>Sedating antihistamines</b>                                                 | 67   | 1.24  | 229  | 1.14  | 1.22 | 0,84-1,78 | 33   | 0.26  | 108  | 0.22  | 33   | 0.26  |
| <b>Estrogen-containing hormone replacement therapy (HRT)</b>                   | 10   | 0.18  | 36   | 0.18  | 1.16 | 0,38-3,50 | 75   | 0.58  | 318  | 0.66  | 75   | 0.58  |
| <b>Thyroid hormones</b>                                                        | 205  | 3.79  | 726  | 3.62  | 1.53 | 1,03-2,26 | 597  | 4.64  | 2229 | 4.61  | 597  | 4.64  |
| <b>Antithyroid drugs</b>                                                       | 23   | 0.42  | 86   | 0.43  | 1.07 | 0,44-2,62 | 20   | 0.16  | 61   | 0.13  | 20   | 0.16  |
| <b>Disease-modifying anti-rheumatic drugs (DMARDs)</b>                         | 42   | 0.78  | 177  | 0.88  | 0.80 | 0,42-1,50 | 107  | 0.83  | 406  | 0.84  | 107  | 0.83  |
| <b>Thiazolidinediones</b>                                                      | 22   | 0.41  | 73   | 0.36  | 2.02 | 0,76-5,38 | 37   | 0.29  | 137  | 0.28  | 37   | 0.29  |
| <b>Other antidiabetics</b>                                                     | 718  | 13.27 | 2842 | 14.19 | 0.68 | 0,54-0,85 | 423  | 3.29  | 1587 | 3.28  | 423  | 3.29  |
| <b>Antiemetic (Metoclopramide)</b>                                             | 83   | 1.53  | 260  | 1.30  | 1.24 | 0,93-1,64 | 117  | 0.91  | 364  | 0.75  | 117  | 0.91  |
| <b>Anticoagulants</b>                                                          | 509  | 9.41  | 1574 | 7.86  | 1.96 | 1,62-2,37 | 309  | 2.40  | 1168 | 2.41  | 309  | 2.40  |
| <b>Morphine/opiates</b>                                                        | 613  | 11.33 | 1860 | 9.29  | 1.88 | 1,61-2,20 | 1373 | 10.68 | 4424 | 9.14  | 1373 | 10.68 |
| <b>=&gt;2 prescriptions for a non-steroidal anti-inflammatory drug (NSAID)</b> | 514  | 9.50  | 2079 | 10.38 | 0.85 | 0,74-0,98 | 440  | 3.42  | 1634 | 3.38  | 440  | 3.42  |
| <b>Statins</b>                                                                 | 680  | 12.56 | 2675 | 13.36 | 0.87 | 0,70-1,06 | 1199 | 9.33  | 4548 | 9.40  | 1199 | 9.33  |
| <b>Proton pump inhibitors</b>                                                  | 2015 | 37.23 | 6920 | 34.55 | 1.56 | 1,40-1,74 | 1681 | 13.08 | 5863 | 12.12 | 1681 | 13.08 |
| <b>Aromatase inhibitors</b>                                                    | 34   | 0.63  | 141  | 0.70  | 0.77 | 0,35-1,69 | 64   | 0.50  | 223  | 0.46  | 64   | 0.50  |

\*Sum of controls columns report number of control moments exposed to each co-morbidity.

NA: Non-applied due to the matching by patient.
